# Supplementary material for: 6-Arylcoumarins: versatile scaffolds for fluorescent sensors
Source: Royal Society of Chemistry journal article supplement (doi:10.1039/c5nj01609f), 2015-01-01
Supplement: c5nj01609f1.pdf [file c5nj01609f1.pdf]

*New Journal of Chemistry*  
Electronic Supplementary Information

**6-Arylcoumarins: Versatile Scaffolds for Fluorescent Sensors**

Takuya Shiraishi, Hiroyuki Kagechika and Tomoya Hirano\*

Institute of Biomaterials and Bioengineering, Tokyo Medical and Dental University (TMDU), 2-3-10 Kanda-Surugadai,  
Chiyoda-ku, Tokyo 101-0062, Japan.

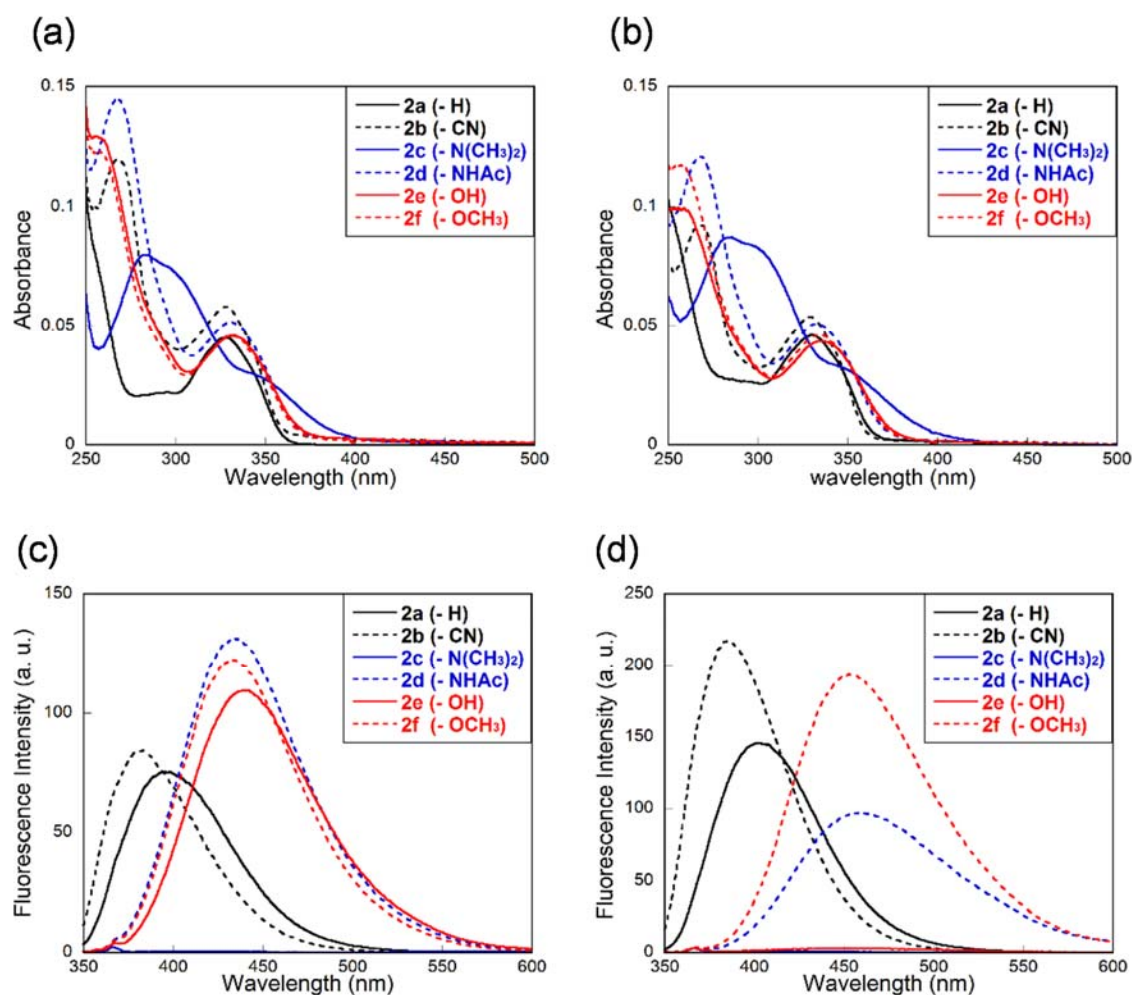

Figure S1. Absorption and fluorescence spectra of 6-aryl-7-methoxycoumarins **2**. Absorption spectra in (a) acetonitrile and (b) methanol, and fluorescence spectra in (c) acetonitrile and (d) methanol excited at 330 nm are shown.

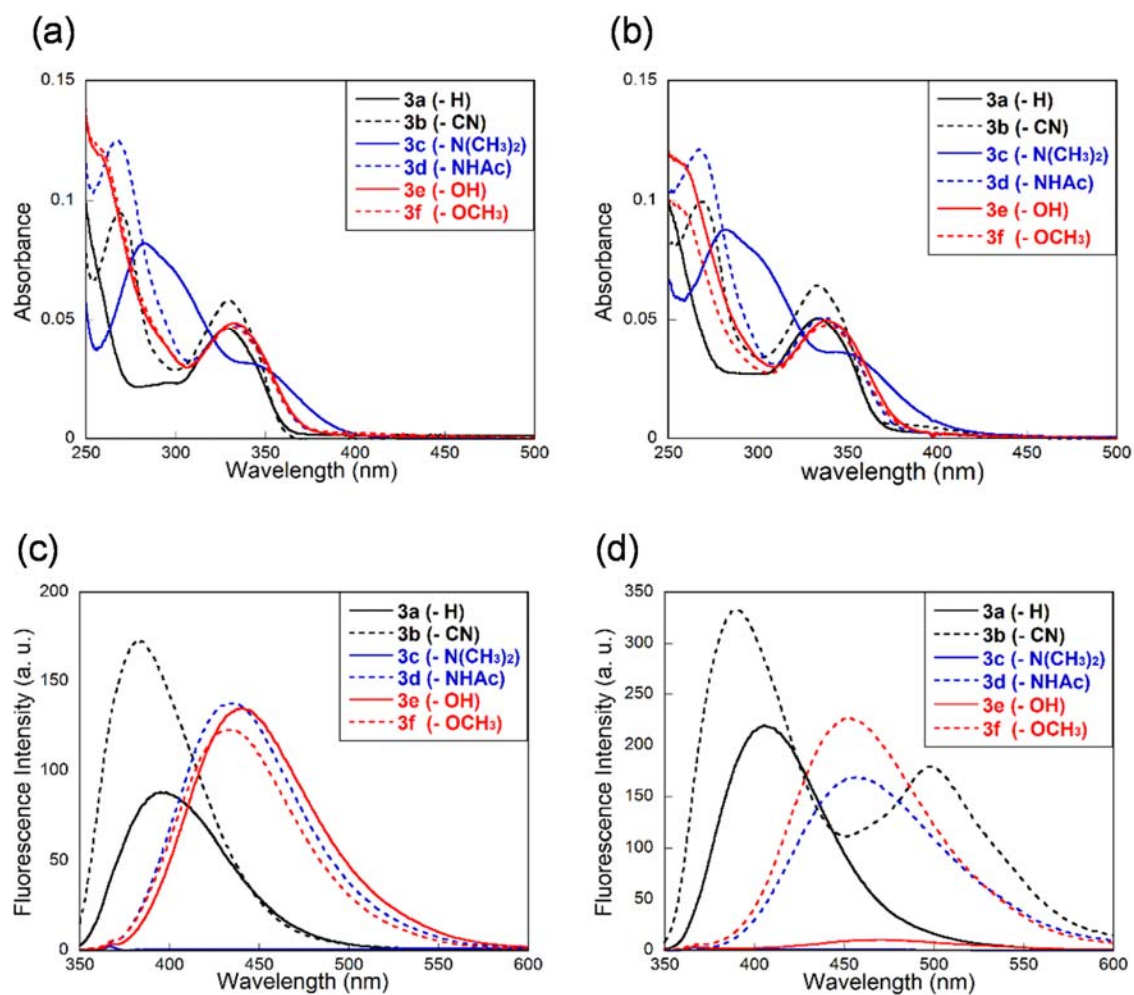

Figure S2. Absorption and fluorescence spectra of 6-aryl-7-hydroxycoumarins **3**. Absorption spectra in (a) acetonitrile and (b) methanol, and fluorescence spectra in (c) acetonitrile and (d) methanol excited at 330 nm are shown.

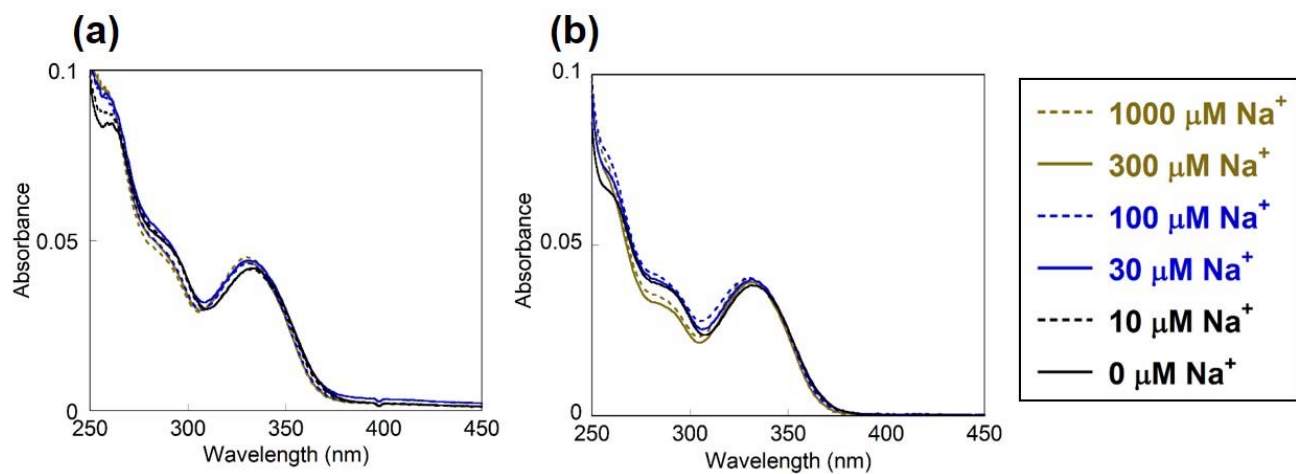

Figure S3. Absorption spectra of (a) **2g** and (b) **3g** with sodium perchlorate (0  $\mu\text{M}$  ~ 1000  $\mu\text{M}$ ) were measured in acetonitrile (0.3% DMSO as a cosolvent).

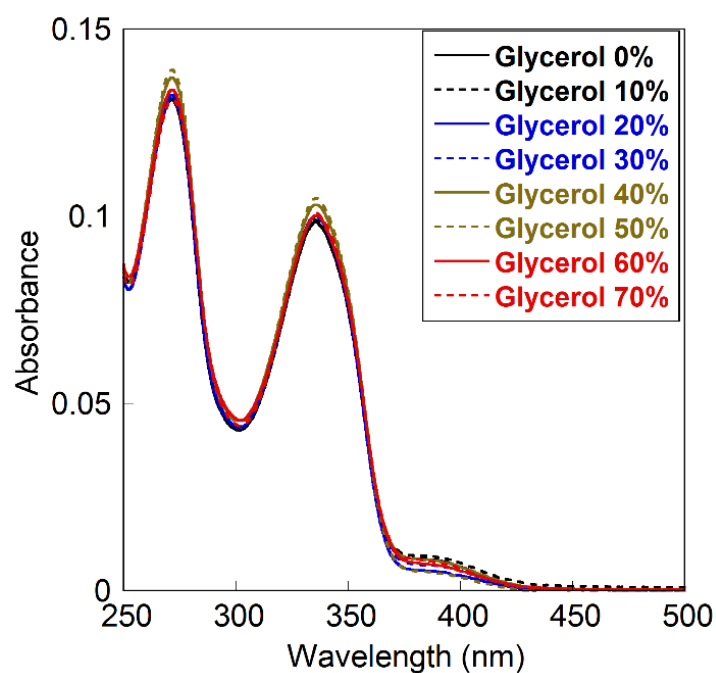

Figure S4. Absorption spectra of **3b** (5  $\mu\text{M}$ ) in a mixture of ethylene glycol and glycerol (0.3% DMSO as a cosolvent) are shown.
